# Supplementary material for: Melatonin inhibits ESCC tumor growth by mitigating the HDAC7/β-catenin/c-Myc positive feedback loop and suppressing the USP10-maintained HDAC7 protein stability
Source: PubMed Central journal article supplement (PMC9513894; doi:10.1186/s40779-022-00412-0), 2022-09-27
Supplement: 40779_2022_412_MOESM1_ESM.pdf [file 40779_2022_412_MOESM1_ESM.pdf]

**Table S1** Detailed information of the primary antibodies

| <b>Antibody</b>                                          | <b>Brand</b>  | <b>Cat No.</b> |
|----------------------------------------------------------|---------------|----------------|
| HDAC1 (10E2)                                             | CST           | #5356          |
| HDAC2 (3F3)                                              | CST           | #5113          |
| HDAC3 (7G6C5)                                            | CST           | #3949          |
| HDAC4                                                    | Proteintec    | 17449-1-AP     |
| HDAC5                                                    | Proteintec    | 16166-1-AP     |
| HDAC6                                                    | Proteintec    | 12834-1-AP     |
| HDAC7 (D4E1L)                                            | CST           | #33418         |
| HDAC7                                                    | Proteintec    | 26207-1-AP     |
| Phospho-HDAC4 (Ser246)/HDAC5 (S259)/HDAC7 (S155) (D27B5) | CST           | #3443          |
| HDAC8                                                    | Elabscience   | E-AB-14127     |
| HDAC9                                                    | Proteintec    | 67364-1-Ig     |
| HDAC10                                                   | Proteintec    | 24913-1-AP     |
| c-Myc (D84C12)                                           | CST           | #5605          |
| p21                                                      | Proteintec    | 10355-1-AP     |
| p27                                                      | Proteintec    | 25614-1-AP     |
| Cyclin A2                                                | Proteintec    | 66391-1-Ig     |
| Cyclin B1                                                | Proteintec    | 55004-1-AP     |
| Cyclin D1                                                | Proteintec    | 60186-1-AP     |
| Cyclin E1                                                | CST           | #4129          |
| CDK1                                                     | Proteintec    | 19532-1-AP     |
| CDK2                                                     | Proteintec    | 10122-1-AP     |
| CDK4                                                     | Proteintec    | 11026-1-AP     |
| CDK6                                                     | Proteintec    | 14052-1-AP     |
| Flag tag                                                 | Proteintec    | 66008-3-Ig     |
| HA tag                                                   | Proteintec    | 51064-2-AP     |
| GFP-tag                                                  | Proteintec    | 66002-1-IG     |
| GST-tag                                                  | CST           | #2624          |
| $\beta$ -catenin                                         | Proteintec    | 66379-1-Ig     |
| $\beta$ -catenin (D10A8)                                 | CST           | #8480          |
| Acetyl- $\beta$ -catenin (Lys49) (D7C2)                  | CST           | #9030          |
| Phospho- $\beta$ -catenin (Ser675) (D2F1)                | CST           | #4176          |
| TCF4                                                     | Proteintec    | 22337-1-AP     |
| USP10 (D7A5)                                             | CST           | #8501          |
| USP10                                                    | Bioss         | bs-9267R       |
| 14-3-3                                                   | Proteintec    | 66061-1-IG     |
| Ubiquitin                                                | Proteintec    | 10201-2-AP     |
| LaminB1                                                  | Bioworld      | BS3574         |
| GAPDH                                                    | CST           | #5174          |
| $\beta$ -actin                                           | CST           | #3700          |
| Vinculin                                                 | Proteintec    | 66305-1-Ig     |
| Flag agarose gel                                         | Sigma         | A-2220         |
| GST beads                                                | GE Healthcare | 17-0756-05     |
| Ni-NTA Agarose                                           | QIAGEN        | 30210          |

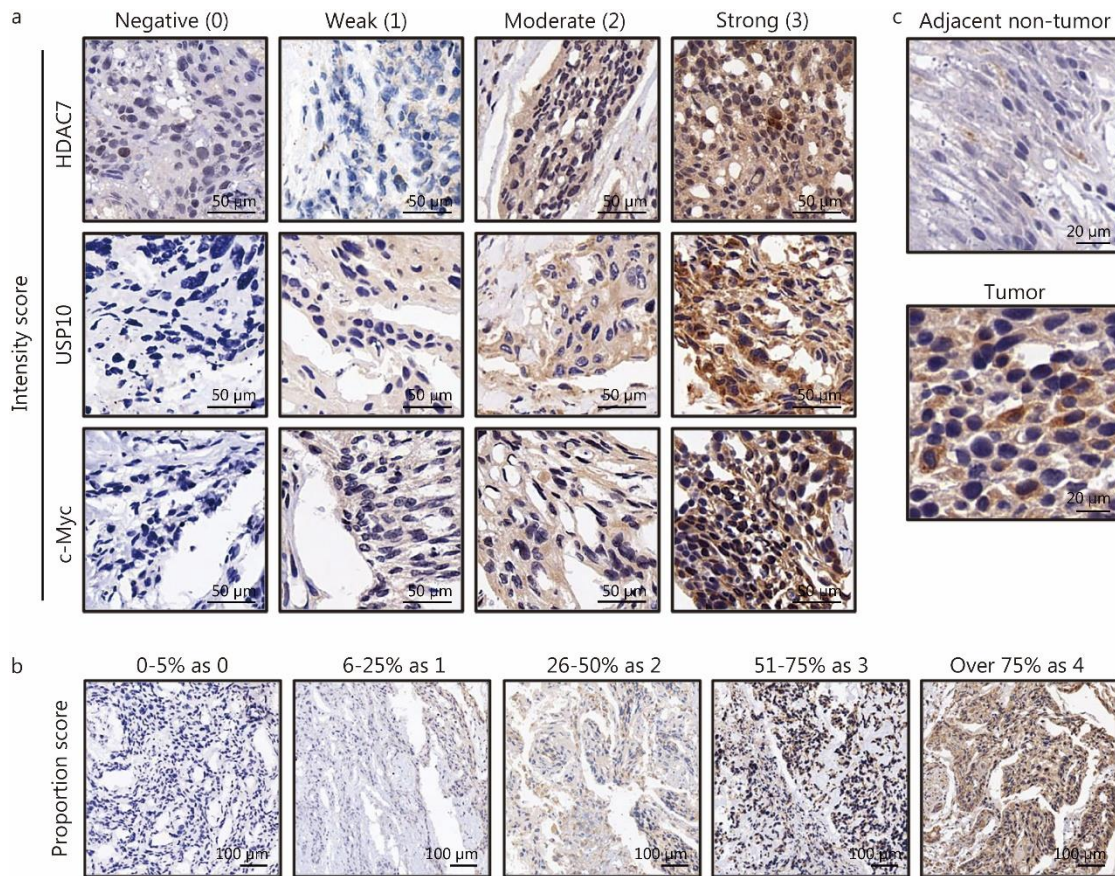

**Fig. S1** Criteria of the IHC staining scores. **a** and **b** Representative HDAC7, USP10 and c-Myc IHC staining images with different intensity score and proportion score in ESCC tissues. Scale bar, 50  $\mu\text{m}$  and 100  $\mu\text{m}$ , respectively. **c** Representative IHC images of the ESCC adjacent non-tumor tissues and tumor tissues. Scale bar, 20  $\mu\text{m}$ . HDAC7 histone deacetylase 7, IHC immunohistochemistry, USP10 ubiquitin-specific peptidase 10

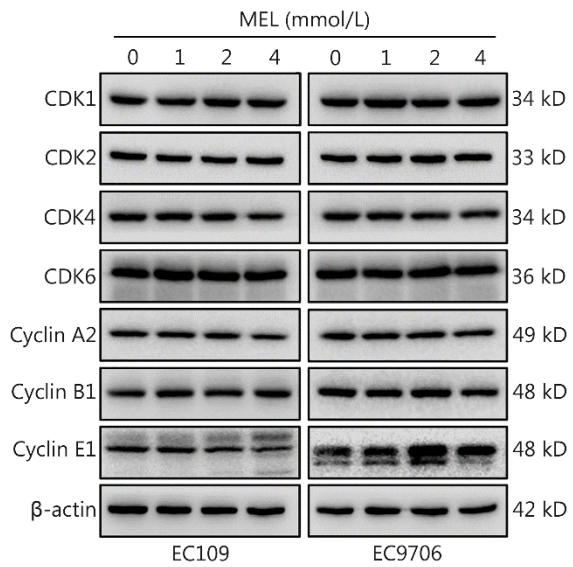

**Fig. S2** Melatonin treatment for 48 h did not affect the expression of the listed cell cycle-related proteins in the EC109 and EC9706 cells. Representative Western blotting results of CDK1, CDK2, CDK4, CDK6, Cyclin A2, Cyclin B1 and Cyclin E1 were shown. CDK cyclin-dependent kinase

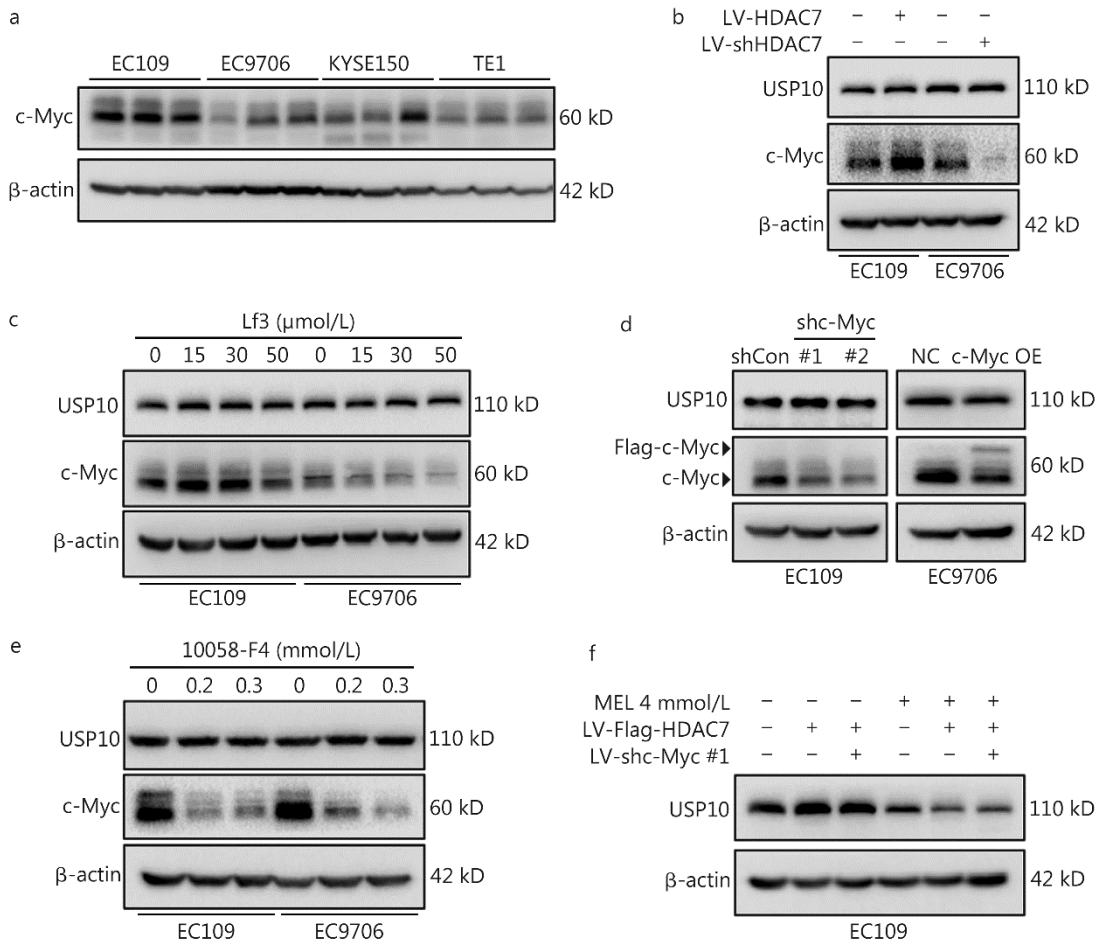

**Fig. S3** USP10 expression is not regulated by the HDAC7/ $\beta$ -catenin/c-Myc pathway. **a** Representative Western blotting result of c-Myc expression in the different ESCC cells lines. **b** and **c** HDAC7 overexpression, knockdown or Lf3 treatment for 48 h did not affect the USP10 protein level in the ESCC cells. **d** and **e** c-Myc overexpression, knockdown or 10058-F4 treatment for 48 h did not affect the USP10 protein level in the ESCC cells. **f** Co-treatment of melatonin, LV-Flag-HDAC7 and LV-shc-Myc #1 was applied to EC109 cells. Representative Western blotting results of USP10 were shown. HDAC7 histone deacetylase 7, USP10 ubiquitin-specific peptidase 10, LV lentivirus
